# Supplementary figures and images for: Dopamine-dependent scaling of subthalamic gamma bursts with movement velocity in patients with Parkinson’s disease
Source: eLife journal article supplement (doi:10.7554/elife.31895), 2018-02-01

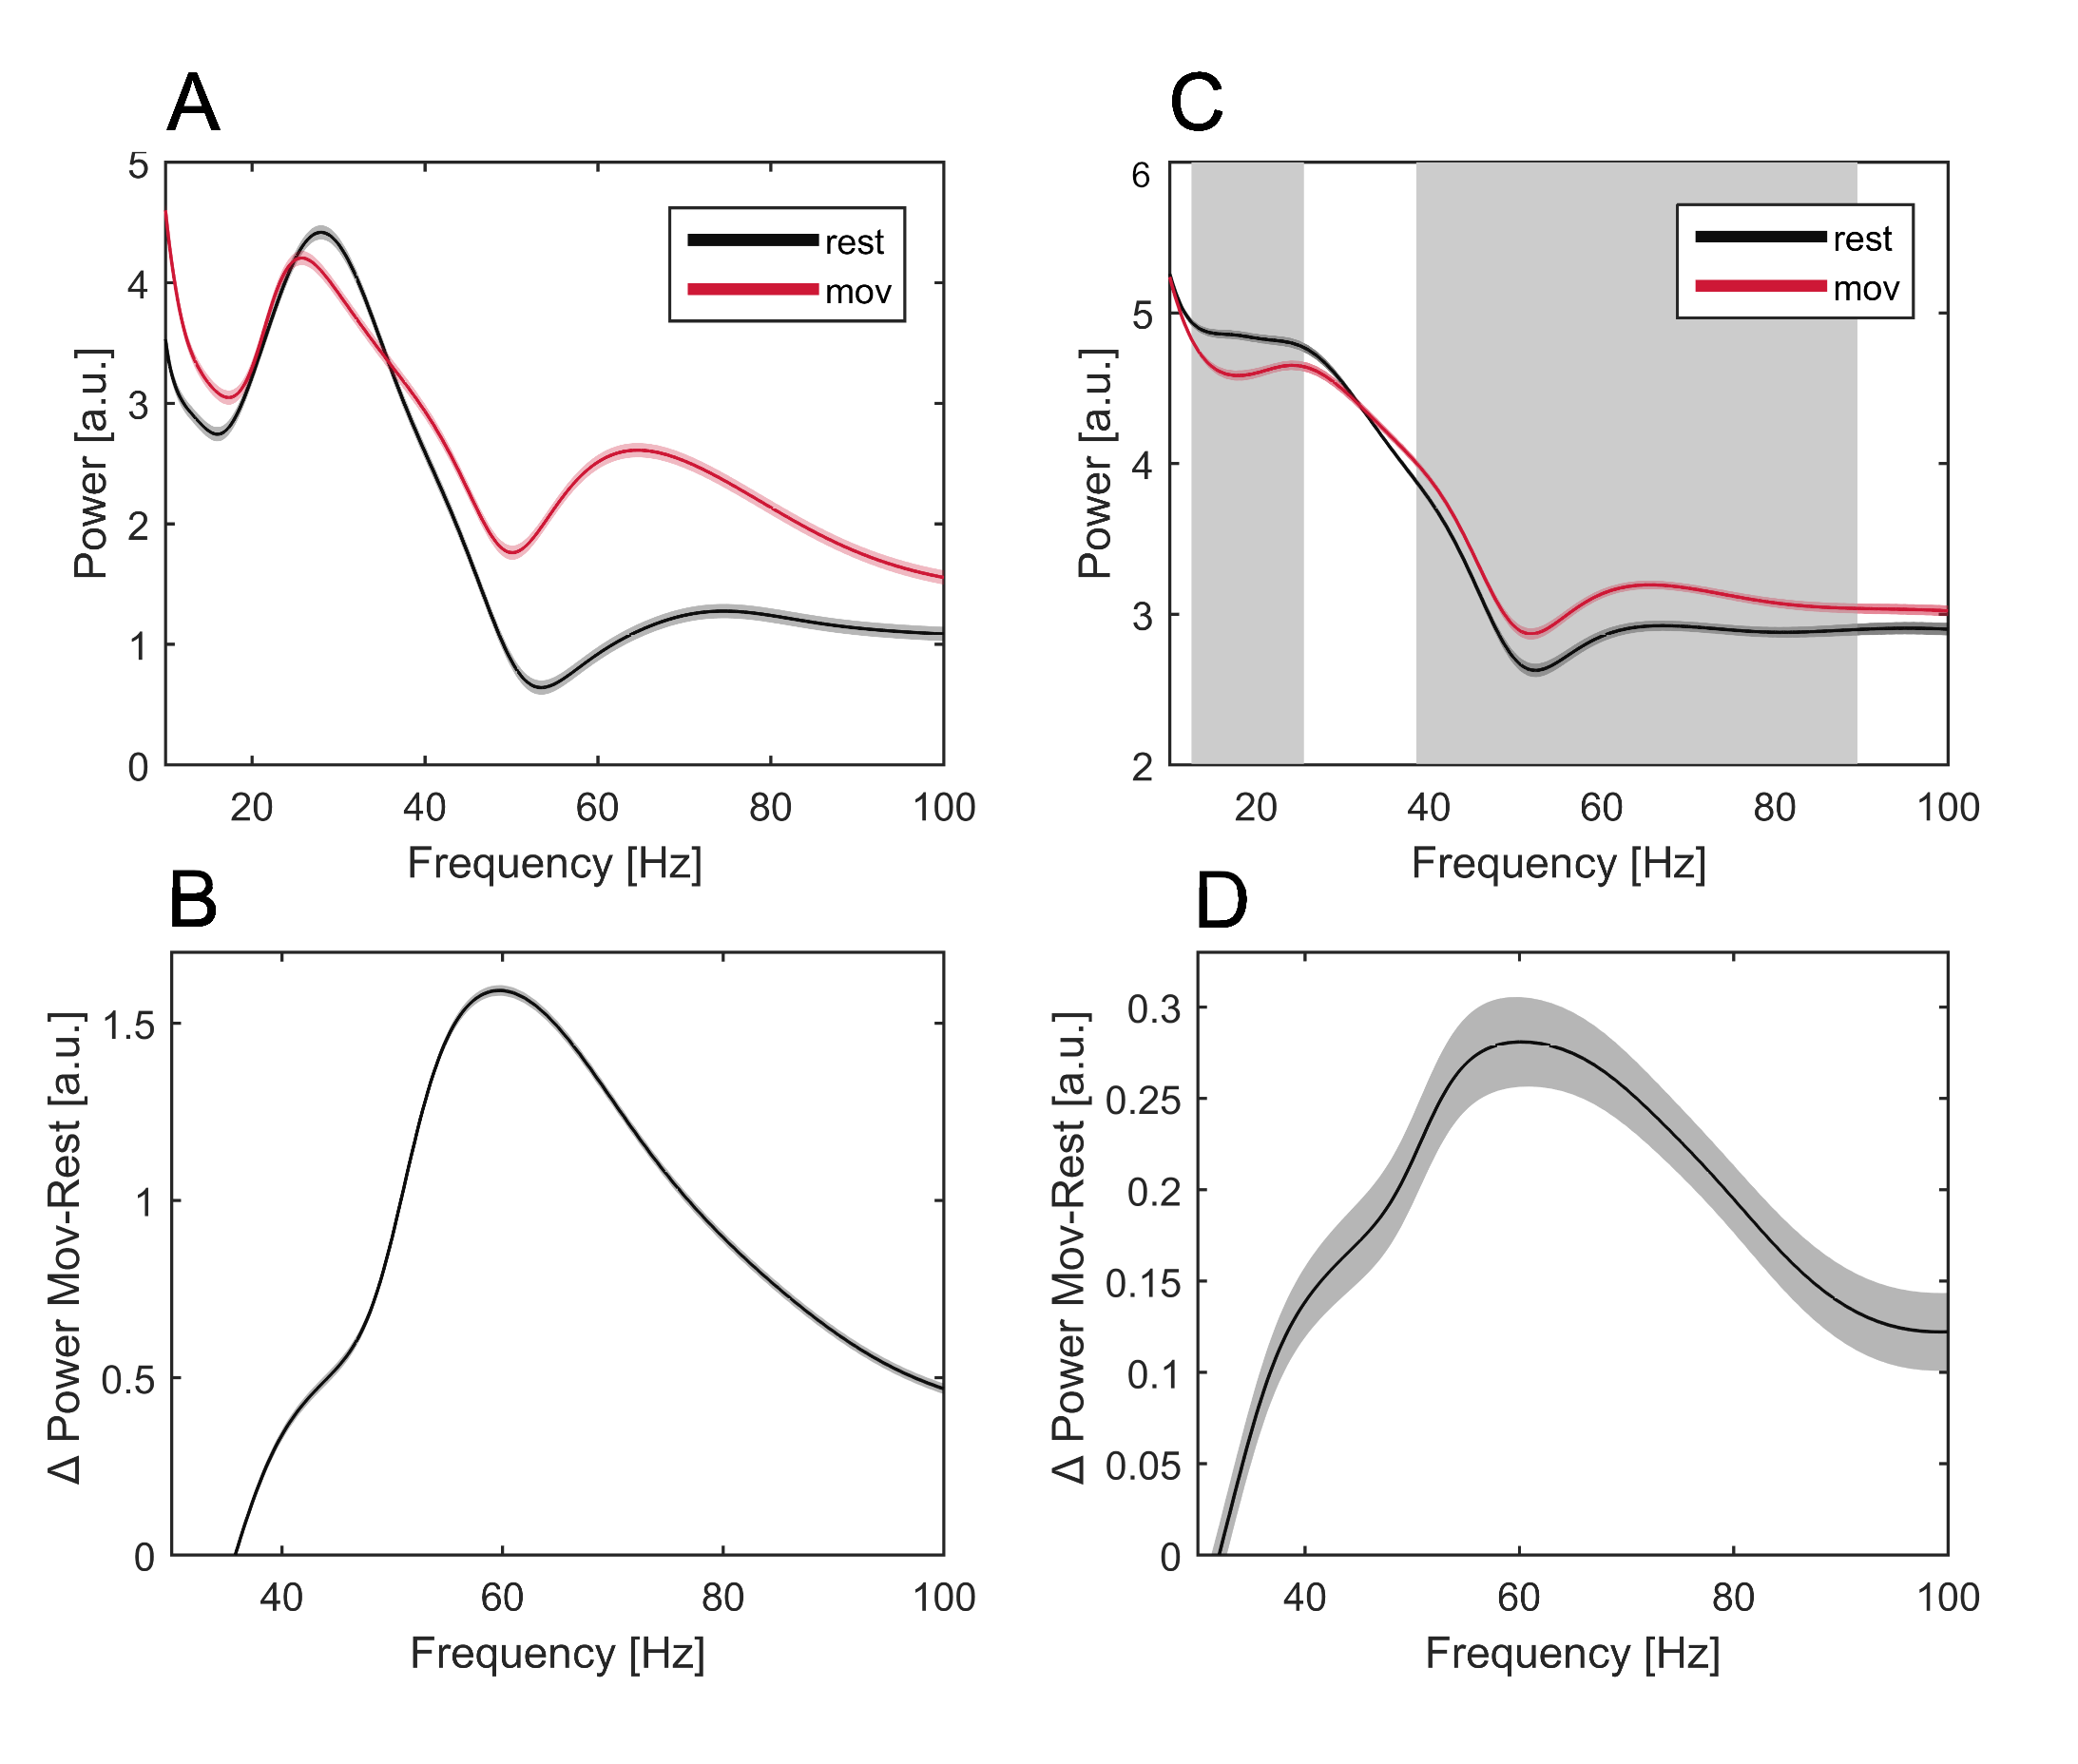

Supplement: supp [file elife-31895-supp-v1.zip › elife_poa_e31895_Figure_2_figure_supplement_1.tif]

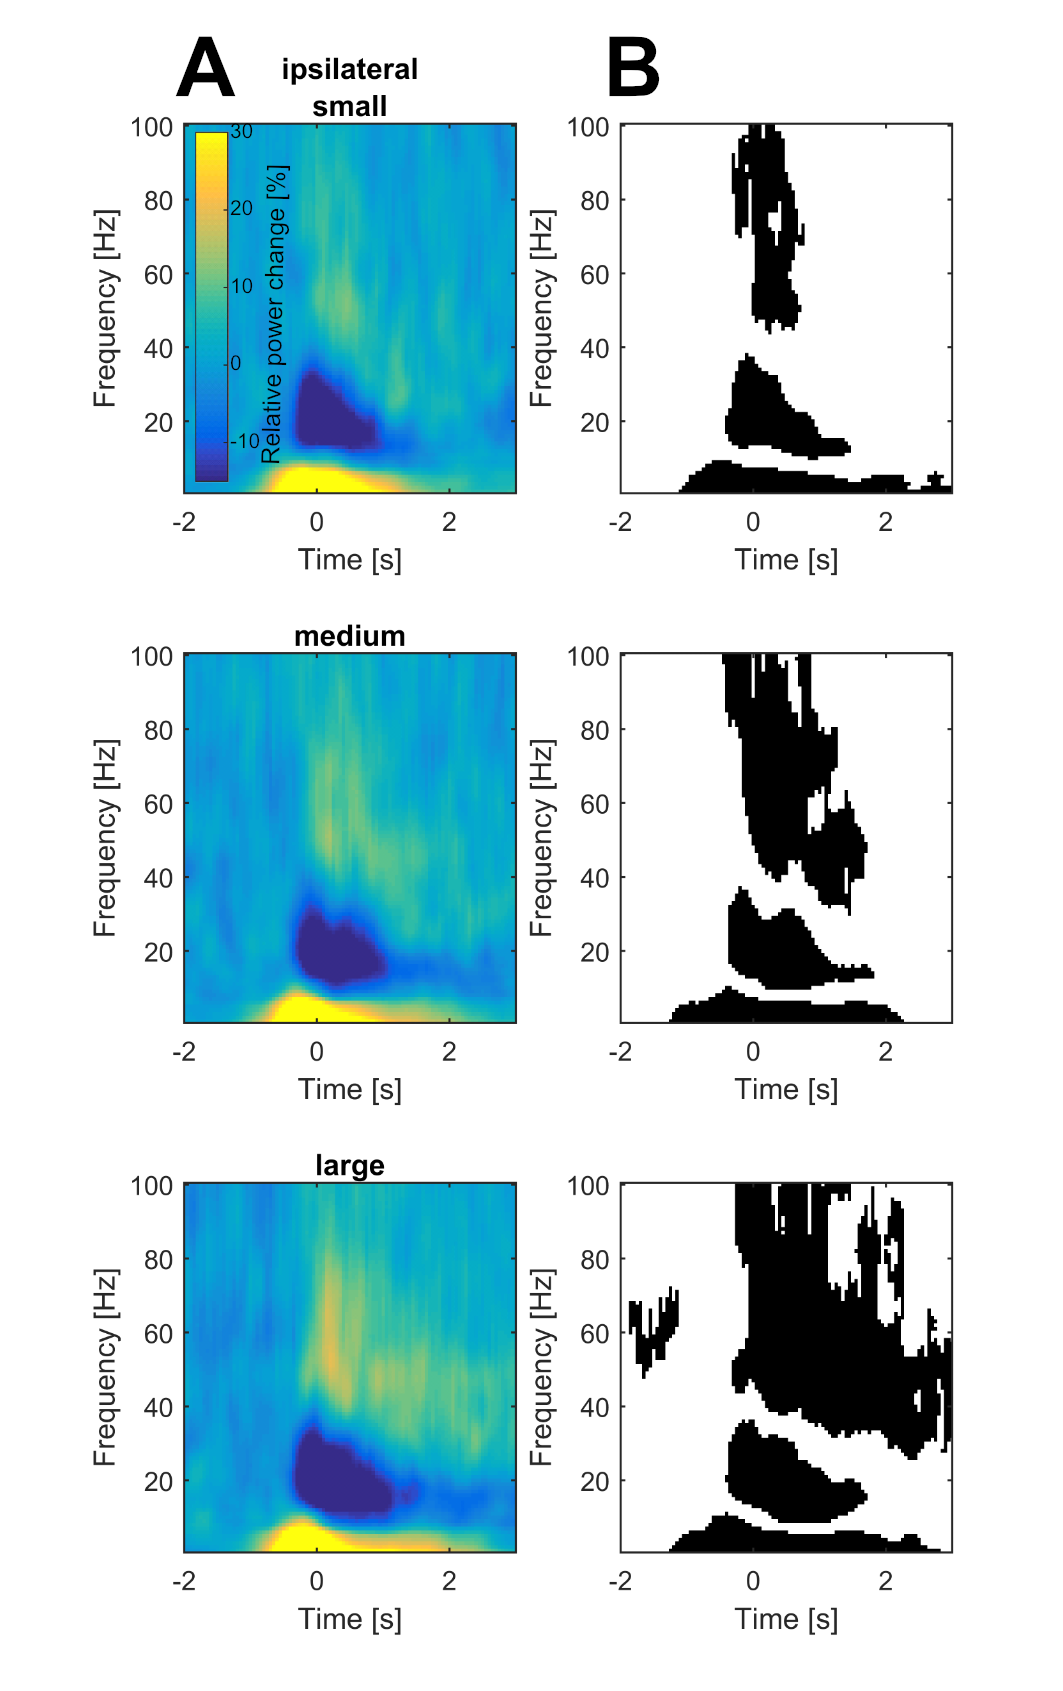

Supplement: supp [file elife-31895-supp-v1.zip › elife_poa_e31895_Figure_2_figure_supplement_2.tif]

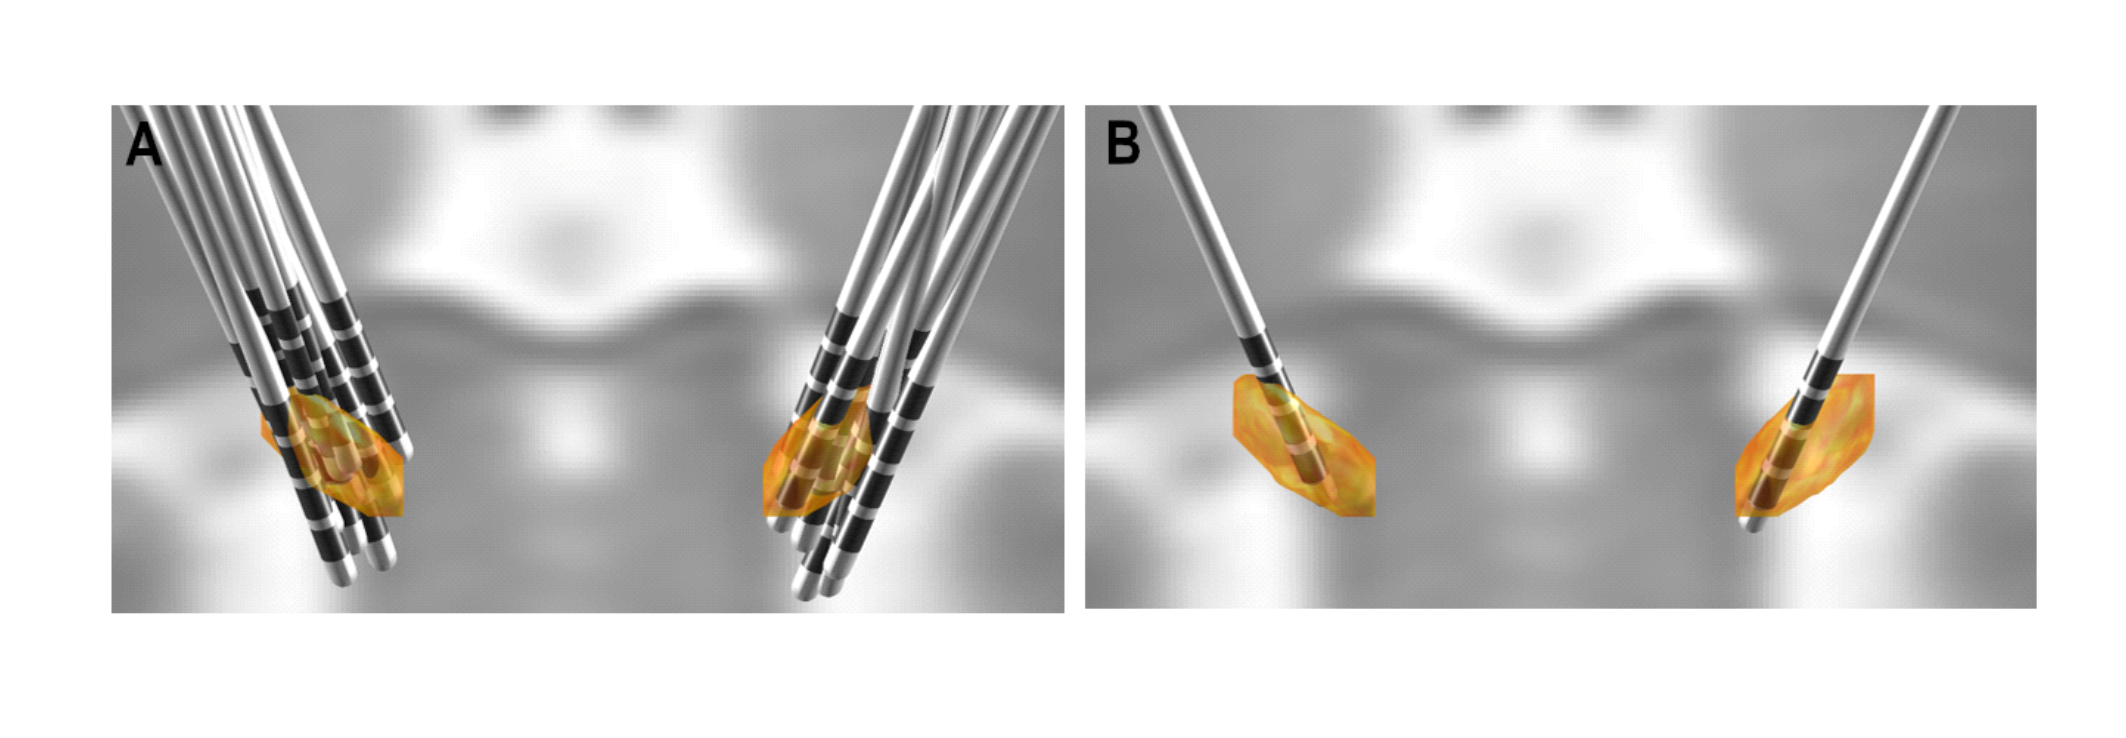

Supplement: supp [file elife-31895-supp-v1.zip › elife_poa_e31895_Figure_7_figure_supplement_1.tif]

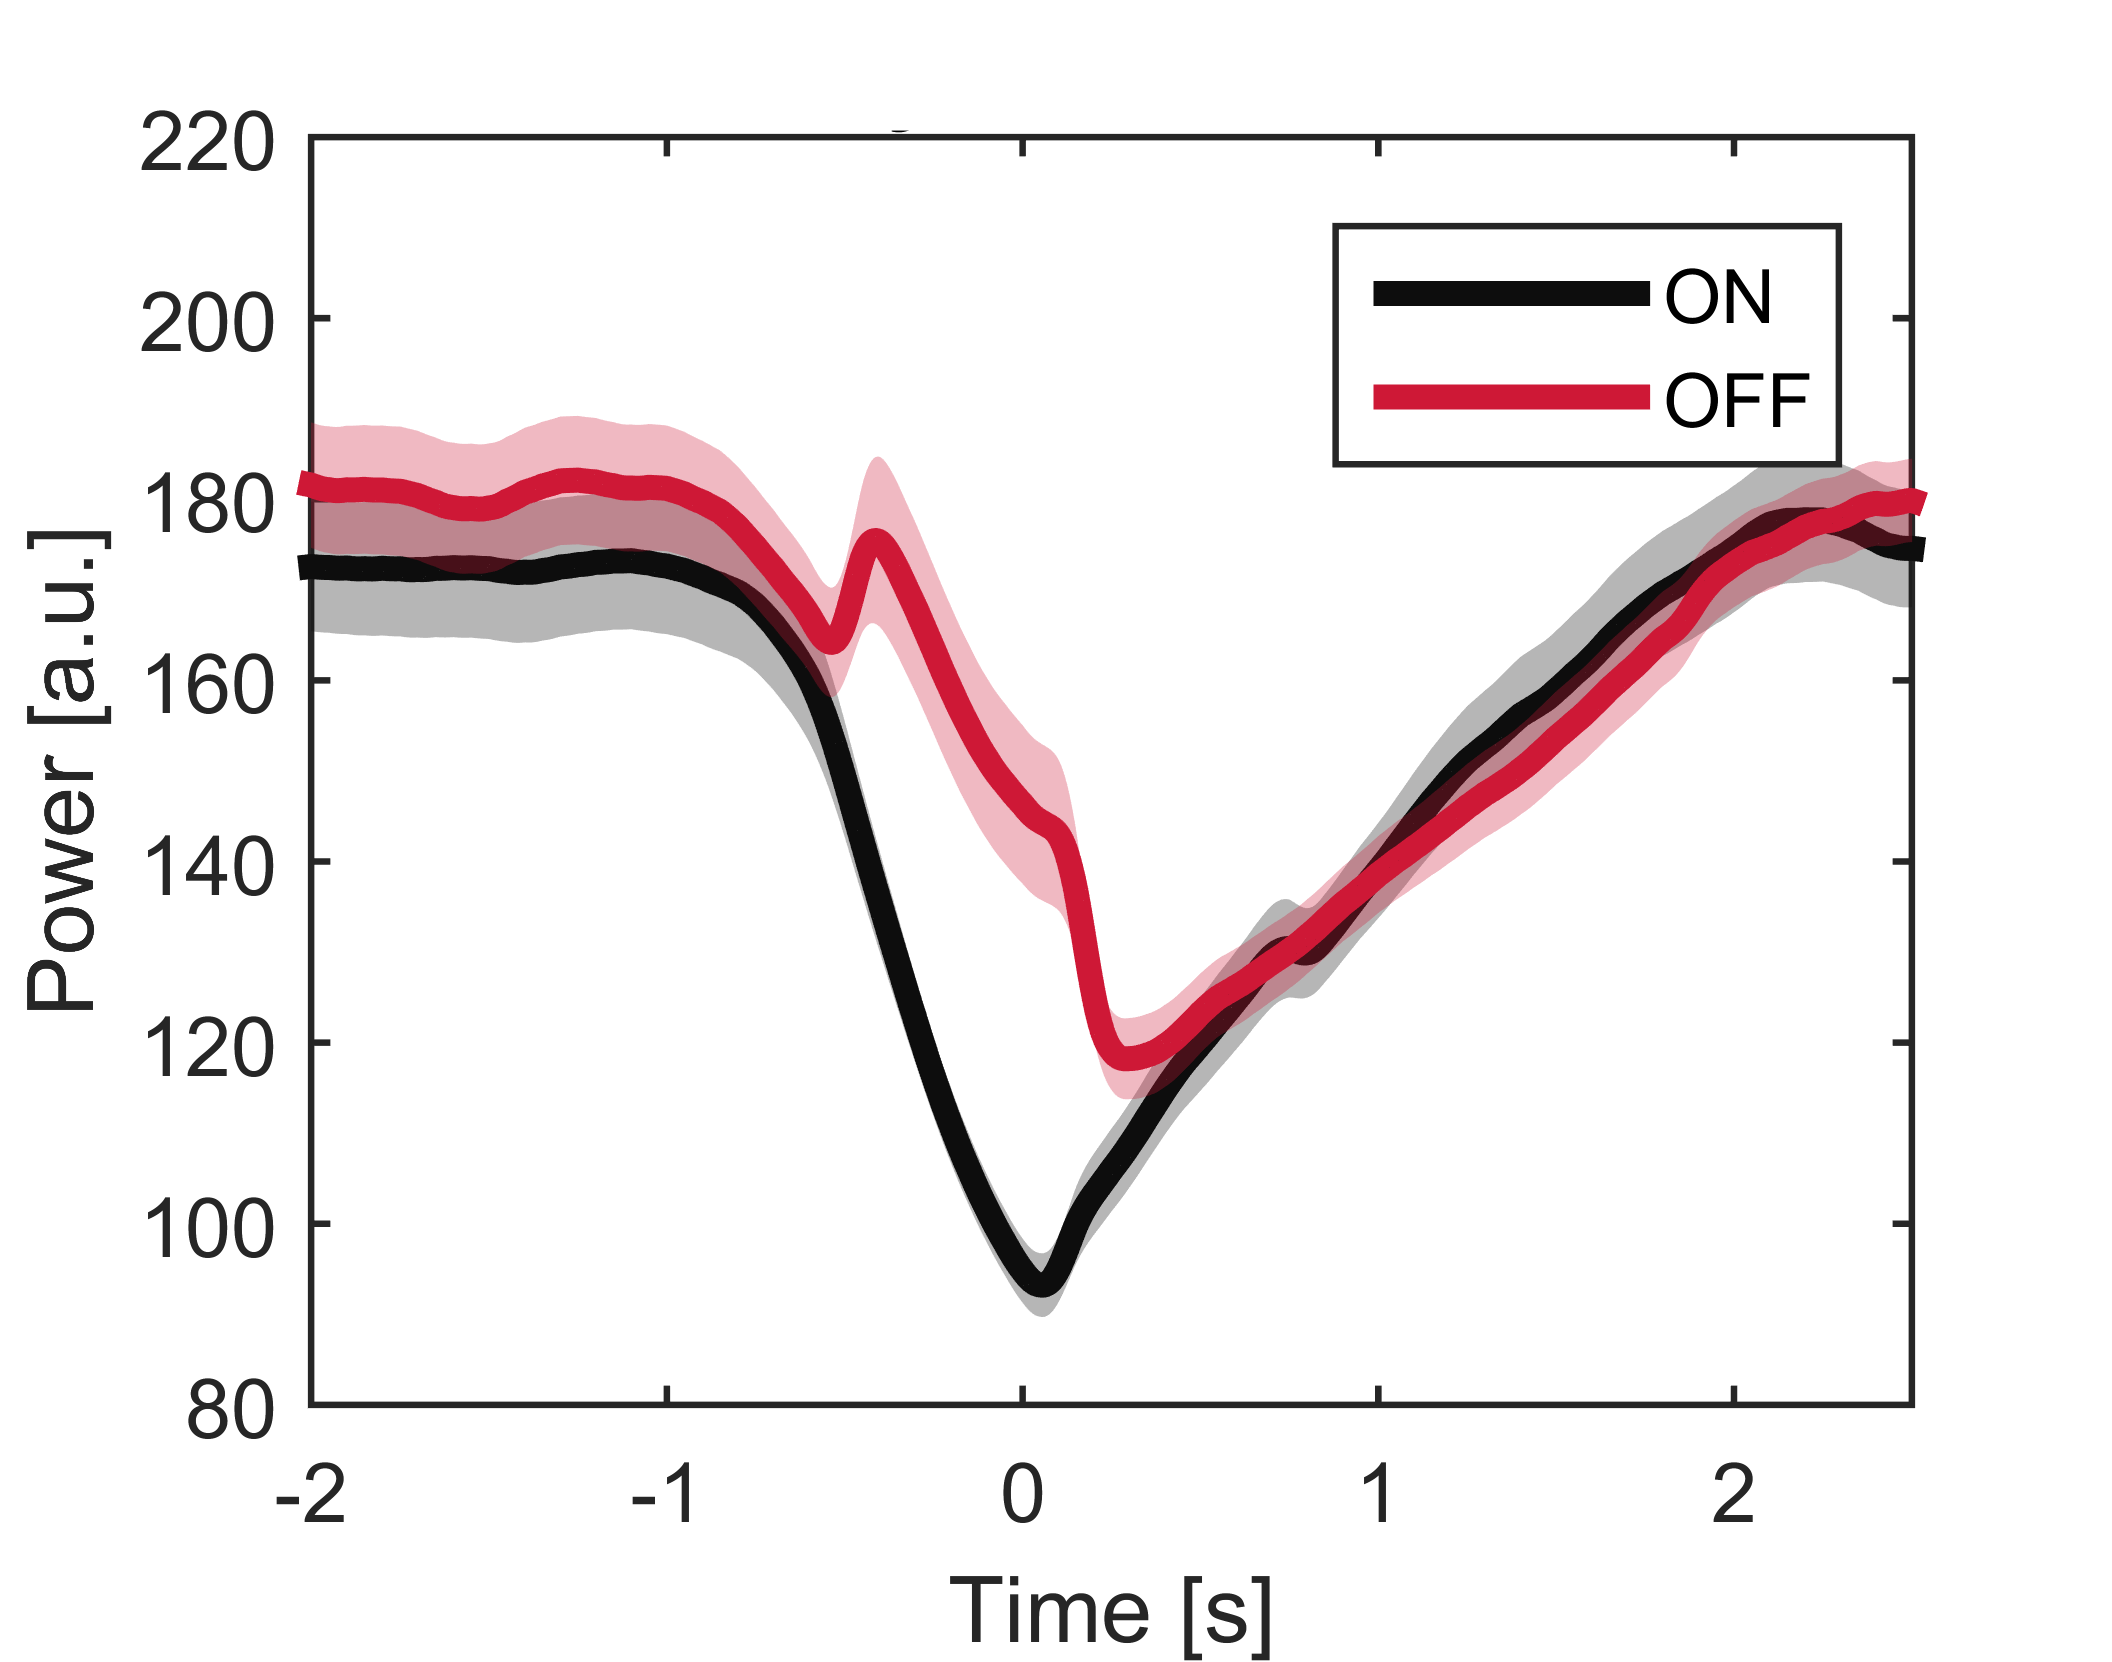

Supplement: supp [file elife-31895-supp-v1.zip › elife_poa_e31895_Figure_2_figure_supplement_3.tif]
